# Supplementary material
Source: Springer Nature journal article supplement (https://www.springermedizin.de/resource/supplementary/12878_2012_62_MOESM3_ESM.pdf/9441628)

MM

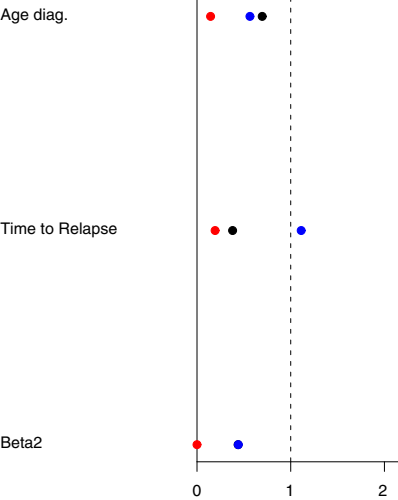

FL

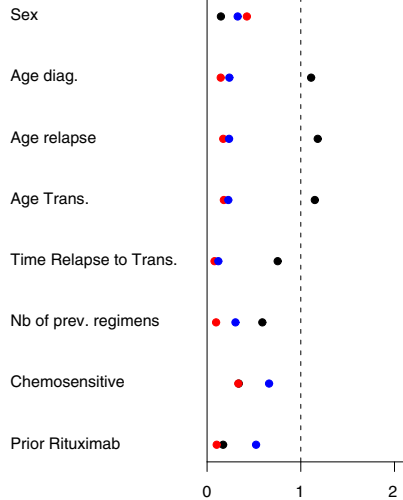

HD

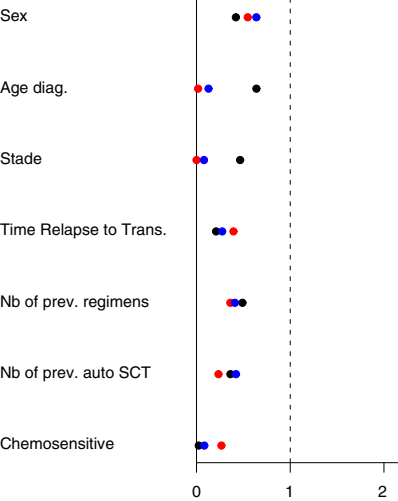

Supplement: MOESM3 [file 9441628]
